# Supplementary material
Source: Research Square preprint supplement (doi:10.21203/rs.3.rs-9622537/v1)
Supplement: Supplementary file 1 [file ae145e92be96308746b4e03a.docx]

# Appendix A

*List of SEC–SA file titles*

The complete list of statutes and regulations comprising the SEC-SA corpus is provided in machine-readable form in the accompanying OSF deposit (appendix_A_SEC-SA_file_list.csv). DOI: [OSF DOI redacted for double-blind review].

# Appendix B

*Included US Code titles in the SEC–US*

| **SEC–US Corpus Titles** |
| --- |
| 1. Aliens and Nationality |
| 2. Labor |
| 3. Arbitration |
| 4. Money and Finance |
| 5. Bankruptcy |
| 6. Navigation and Navigable Waters |
| 7. Banks and Banking |
| 8. Patents |
| 9. Commerce and Trade |
| 10. Public Contracts |
| 11. Copyrights |
| 12. Public Health and Welfare |
| 13. Crimes and Criminal Procedure |
| 14. Transportation |
| 15. Domestic Security |
| 16. Administrative Law Appendices |
| 17. Education |
| 18. Bankruptcy Law Appendices |
| 19. Food and Drugs |
| 20. Judicial Procedure Appendices |
| 21. Judiciary and Judicial Procedure |

# Appendix C

*Most frequent absolute keywords in SEC-US (top 200 by raw frequency)*

The complete ranked list of the 200 most frequent absolute keywords in SEC-US, with raw frequency and dispersion values, is provided in the accompanying OSF deposit (appendix_C_SEC-US_absolute_keywords.csv). DOI: [OSF DOI redacted for double-blind review].

# Appendix D

*Most frequent absolute keywords in SEC-SA (frequency ≥5)*

The complete list of 199 word types occurring at least five times in SEC-SA but absent from SEC-US, with raw frequency and dispersion values, is provided in the accompanying OSF deposit (appendix_D_SEC-SA_absolute_keywords.csv). DOI: [OSF DOI redacted for double-blind review].

# Appendix E

*Top positive content keywords in the SEC-SA compared to the SEC-US, ordered by log likelihood*

These keywords occur in both corpora but are statistically overrepresented in the SEC-SA. Frequencies are normalised per 10,000 tokens; all entries significant at *p* < .001. The 25 highest-ranked entries are shown below; the full ranked list (n = 195) is provided in the accompanying OSF deposit (appendix_E_SEC-SA_positive_keywords_full.csv). DOI: [OSF DOI redacted for double-blind review].

| **Rank** | **Keyword** | **SEC-SA Freq/10k** | **SEC-US Freq/10k** | **LL** |
| --- | --- | --- | --- | --- |
| 1 | article | 140.82 | 0.84 | 53,805.14 |
| 2 | shall | 235.44 | 80.63 | 12,583.24 |
| 3 | ministry | 16.64 | 0.00 | 7,246.18 |
| 4 | law | 60.36 | 12.03 | 6,220.97 |
| 5 | kingdom | 12.81 | 0.02 | 5,381.77 |
| 6 | minister | 12.29 | 0.02 | 5,174.07 |
| 7 | competent | 15.39 | 0.35 | 4,711.77 |
| 8 | said | 18.53 | 1.23 | 3,953.93 |
| 9 | stipulated | 9.57 | 0.04 | 3,757.70 |
| 10 | saudi | 7.91 | 0.00 | 3,440.86 |
| 11 | decision | 17.98 | 1.72 | 3,177.13 |
| 12 | court | 48.88 | 15.63 | 2,895.69 |
| 13 | following | 23.83 | 4.67 | 2,493.79 |
| 14 | right | 17.52 | 2.46 | 2,418.63 |
| 15 | prejudice | 8.04 | 0.21 | 2,370.63 |
| 16 | regulations | 31.80 | 9.03 | 2,217.32 |
| 17 | exceeding | 9.11 | 0.47 | 2,158.51 |
| 18 | debtor | 17.60 | 2.98 | 2,095.82 |
| 19 | circuit | 11.30 | 1.01 | 2,070.18 |
| 20 | person | 40.13 | 14.45 | 1,978.67 |
| 21 | procedures | 19.01 | 3.76 | 1,972.30 |
| 22 | lawsuit | 4.85 | 0.02 | 1,899.86 |
| 23 | accordance | 23.22 | 5.79 | 1,895.72 |
| 24 | judgment | 13.89 | 2.17 | 1,768.32 |
| 25 | council | 16.42 | 3.12 | 1,768.07 |
